# Supplementary material for: The evaluation of lanthanum trapped prussian blue as a phosphate binding agent with reduced bone uptake
Source: Royal Society of Chemistry journal article supplement (doi:10.1039/c5nj03126e), 2016-01-01
Supplement: c5nj03126e1.pdf [file c5nj03126e1.pdf]

## Supporting information

### Evaluation of Lanthanum Trapped Prussian Blue as a Phosphate Binding agent with reduced Bone uptake

Fei-Yan Chen<sup>a</sup>, Zhe-Jia Gu<sup>b</sup>, Jing-Wei Yi<sup>b</sup>, Xian-zhu Xu<sup>c</sup>, Padmakar Kulkarni<sup>d</sup>, Qun Tang<sup>b,d\*</sup>

<sup>a</sup>College of Chemistry, Nanchang University, Nanchang, 330031, China

<sup>b</sup>Institute for Advanced Study, Nanchang University, Nanchang, 330031, China

<sup>c</sup>College of Life Science, Jiangxi Normal University, Nanchang, 330022, China

<sup>d</sup>Department of Radiology, UT Southwestern Medical Center, Dallas, TX 75390, USA

E-mail: tangqun@ncu.edu.cn

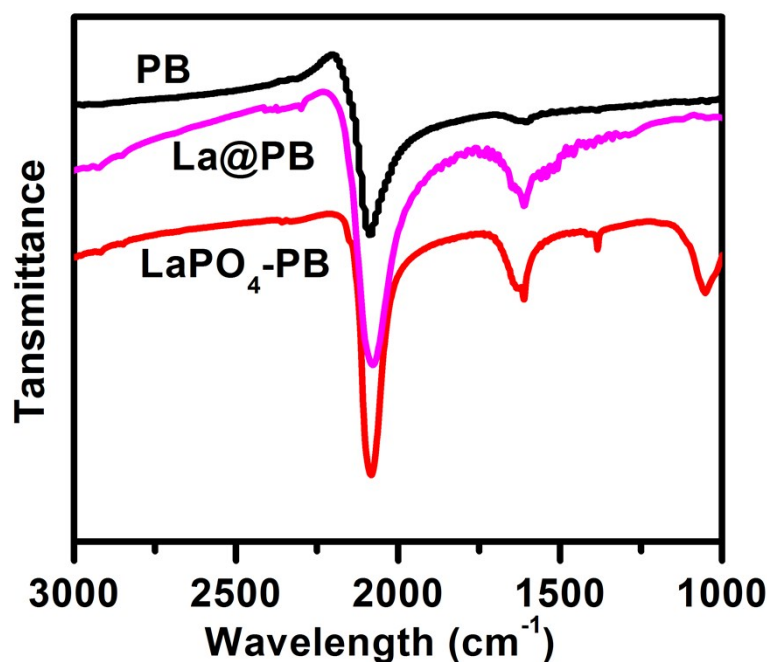

Figure S1. FT-IR spectrum of pristine PB, La@PB and LaPO<sub>4</sub>-PB. The peak localized at 2079 cm<sup>-1</sup> can be assigned C–N stretching mode of Fe(II)–CN–Fe(III) fragment.
